# Supplementary material
Source: PubMed Central journal article supplement (PMC4969402)
Supplement: ajcr0006-1537-f3.pdf [file ajcr0006-1537-f3.pdf]

## Predictive microRNA markers of oral leukoplakia that progress to cancer

**Supplemental Table 1.** Conserved Genes Potentially Targeted by miRNA's -129-2-3p, 204-5p, 208b-3p and 3065-5p

| Gene ID <sup>a</sup> | Gene Name                                                                  | PANTHER Family/Subfamily                                                                    | PANTHER Protein Class                                                                                      |
|----------------------|----------------------------------------------------------------------------|---------------------------------------------------------------------------------------------|------------------------------------------------------------------------------------------------------------|
| COLQ                 | Acetylcholinesterase collagenic tail peptide                               | ACETYLCHOLINESTERASE COLLAGENIC TAIL PEPTIDE (PTHR24023:SF6)                                | Transporter, surfactant, receptor, extracellular matrix structural protein, antibacterial response protein |
| REEP1                | Receptor expression-enhancing protein 1                                    | RECEPTOR EXPRESSION-ENHANCING PROTEIN 1 (PTHR12300:SF33)                                    | Transporter, receptor                                                                                      |
| DDX5                 | Probable ATP-dependent RNA helicase DDX5                                   | ATP-DEPENDENT RNA HELICASE DDX5-RELATED (PTHR24031:SF219)                                   | RNA helicase                                                                                               |
| FZD8                 | Frizzled-8                                                                 | FRIZZLED-8 (PTHR11309:SF89)                                                                 | signaling molecule, G-protein coupled receptor                                                             |
| PURB                 | Transcriptional activator protein Pur-beta                                 | TRANSCRIPTIONAL ACTIVATOR PROTEIN PUR-BETA (PTHR12611:SF4)                                  | transcription factor, DNA binding protein                                                                  |
| LCOR                 | Ligand-dependent corepressor                                               | LIGAND-DEPENDENT COREPRESSOR (PTHR21545:SF14)                                               | DNA-directed RNA polymerase                                                                                |
| TMBIM6               | Bax inhibitor 1                                                            | BAX INHIBITOR 1 (PTHR23291:SF34)                                                            | -                                                                                                          |
| SCN4A                | Sodium channel protein type 4 subunit alpha                                | SODIUM CHANNEL PROTEIN TYPE 4 SUBUNIT ALPHA (PTHR10037:SF223)                               | voltage-gated calcium channel                                                                              |
| PACS2                | Phosphofurin acidic cluster sorting protein 2                              | PHOSPHOFURIN ACIDIC CLUSTER SORTING PROTEIN 2 (PTHR13280:SF15)                              | -                                                                                                          |
| ASB7                 | Ankyrin repeat and SOCS box protein 7                                      | ANKYRIN REPEAT AND SOCS BOX PROTEIN 7 (PTHR24123:SF25)                                      | -                                                                                                          |
| PDCD4                | Programmed cell death protein 4                                            | PROGRAMMED CELL DEATH PROTEIN 4 (PTHR12626:SF3)                                             | translation elongation factor                                                                              |
| LRP6                 | Low-density lipoprotein receptor-related protein 6                         | LOW-DENSITY LIPOPROTEIN RECEPTOR-RELATED PROTEIN 6 (PTHR10529:SF109)                        | Receptor, extracellular matrix glycoprotein                                                                |
| PHF21B               | PHD finger protein 21B                                                     | PHD FINGER PROTEIN 21B (PTHR24102:SF18)                                                     | transcription cofactor, ubiquitin-protein ligase                                                           |
| SCN2B                | Sodium channel subunit beta-2                                              | SODIUM CHANNEL SUBUNIT BETA-2 (PTHR13869:SF3)                                               | voltage-gated sodium channel, voltage-gated ion channel, cell adhesion molecule                            |
| NAV2                 | Neuron navigator 2                                                         | NEURON NAVIGATOR 2 (PTHR12784:SF6)                                                          | -                                                                                                          |
| VAV3                 | Guanine nucleotide exchange factor VAV3                                    | GUANINE NUCLEOTIDE EXCHANGE FACTOR VAV3 (PTHR22826:SF97)                                    | signaling molecule, guanyl-nucleotide exchange factor                                                      |
| SNRK                 | SNF-related serine/threonine-protein kinase                                | SNF-RELATED SERINE/THREONINE-PROTEIN KINASE (PTHR24343:SF201)                               | non-receptor serine/threonine protein kinase                                                               |
| GATA4                | Transcription factor GATA-4                                                | TRANSCRIPTION FACTOR GATA-4 (PTHR10071:SF154)                                               | zinc finger transcription factor, nuclease                                                                 |
| AAK1                 | AP2-associated protein kinase 1                                            | AP2-ASSOCIATED PROTEIN KINASE 1 (PTHR22967:SF57)                                            | non-receptor serine/threonine protein kinase                                                               |
| TBC1D22B             | TBC1 domain family member 22B                                              | TBC1 DOMAIN FAMILY MEMBER 22B (PTHR22957:SF321)                                             | Hydrolase, G-protein modulator                                                                             |
| FAM110B              | Protein FAM110B                                                            | PROTEIN FAM110B (PTHR14758:SF2)                                                             | -                                                                                                          |
| SOX6                 | Transcription factor SOX-6                                                 | TRANSCRIPTION FACTOR SOX-6 (PTHR10270:SF89)                                                 | HMG box transcription factor, nucleic acid binding                                                         |
| PAK2                 | Serine/threonine-protein kinase PAK 2                                      | SERINE/THREONINE-PROTEIN KINASE PAK 2 (PTHR24361:SF281)                                     | -                                                                                                          |
| ZNF704               | Zinc finger protein 704                                                    | ZINC FINGER PROTEIN 704 (PTHR13006:SF7)                                                     | transcription cofactor                                                                                     |
| TRAF4                | TNF receptor-associated factor 4                                           | TNF RECEPTOR-ASSOCIATED FACTOR 4 (PTHR10131:SF89)                                           | signaling molecule                                                                                         |
| USP13                | Ubiquitin carboxyl-terminal hydrolase 13                                   | -                                                                                           | -                                                                                                          |
| DYNLL2               | Dynein light chain 2, cytoplasmic                                          | DYNEIN LIGHT CHAIN 2, CYTOPLASMIC (PTHR11886:SF54)                                          | enzyme modulator, microtubule family cytoskeletal protein                                                  |
| ANKRD52              | Serine/threonine-protein phosphatase 6 regulatory ankyrin repeat subunit C | SERINE/THREONINE-PROTEIN PHOSPHATASE 6 REGULATORY ANKYRIN REPEAT SUBUNIT C (PTHR24158:SF17) | -                                                                                                          |
| MMP16                | Matrix metalloproteinase-16                                                | MATRIX METALLOPROTEINASE-16 (PTHR10201:SF26)                                                | -                                                                                                          |

## Predictive microRNA markers of oral leukoplakia that progress to cancer

|           |                                                                     |                                                                                        |                                                                                       |
|-----------|---------------------------------------------------------------------|----------------------------------------------------------------------------------------|---------------------------------------------------------------------------------------|
| DNAJC14   | DnaJ homolog subfamily C member 14                                  | DNAJ HOMOLOG SUBFAMILY C MEMBER 14 (PTHR24078:SF191)                                   | -                                                                                     |
| NMU       | Neuromedin-U                                                        | NEUROMEDIN-U (PTHR15390:SF0)                                                           | -                                                                                     |
| GLS       | Glutaminase kidney isoform, mitochondrial                           | GLUTAMINASE KIDNEY ISOFORM, MITOCHONDRIAL (PTHR12544:SF30)                             | hydrolase                                                                             |
| AMER2     | APC membrane recruitment protein 2                                  | APC MEMBRANE RECRUITMENT PROTEIN 2 (PTHR22237:SF1)                                     | -                                                                                     |
| ZNF431    | Zinc finger protein 431                                             | ZINC FINGER PROTEIN 431 (PTHR24384:SF41)                                               | KRAB box transcription factor                                                         |
| HMGB1     | High mobility group protein B1                                      | HIGH MOBILITY GROUP PROTEIN B1-RELATED (PTHR13711:SF164)                               | HMG box transcription factor, signaling molecule chromatin/ chromatin-binding protein |
| KLF12     | Krüppel-like factor 12                                              | -                                                                                      | -                                                                                     |
| SOX7      | Transcription factor SOX-7                                          | TRANSCRIPTION FACTOR SOX-7 (PTHR10270:SF210)                                           | HMG box transcription factor, nucleic acid binding                                    |
| LARP7     | La-related protein 7                                                | LA-RELATED PROTEIN 7 (PTHR22792:SF66)                                                  | ribonucleoprotein                                                                     |
| CDC42     | Cell division control protein 42 homolog                            | CELL DIVISION CONTROL PROTEIN 42 HOMO-LOG (PTHR24072:SF136)                            | small GTPase                                                                          |
| TMSB4Y    | Thymosin beta-4, Y-chromosomal                                      | THYMOSIN BETA-4, Y-CHROMOSOMAL (PTHR12021:SF8)                                         | -                                                                                     |
| KIAA1024L | UPF0258 protein KIAA1024-like                                       | UPF0258 PROTEIN KIAA1024-LIKE (PTHR31530:SF4)                                          | -                                                                                     |
| UHMK1     | Serine/threonine-protein kinase Kist                                | SERINE/THREONINE-PROTEIN KINASE KIST (PTHR23139:SF14)                                  | mRNA splicing factor                                                                  |
| NHLRC2    | NHL repeat-containing protein 2                                     | NHL REPEAT-CONTAINING PROTEIN 2 (PTHR13833:SF49)                                       | -                                                                                     |
| TCF4      | Transcription factor 4                                              | TRANSCRIPTION FACTOR 4 (PTHR11793:SF10)                                                | basic helix-loop-helix transcrip- tion factor, nucleic acid binding                   |
| TM2D1     | TM2 domain-containing protein 1                                     | TM2 DOMAIN-CONTAINING PROTEIN 1 (PTHR21016:SF1)                                        | -                                                                                     |
| ZNF66     | Putative zinc finger protein 66                                     | ZINC FINGER PROTEIN 66-RELATED (PTHR24384:SF105)                                       | KRAB box transcription factor                                                         |
| TPD52L3   | Tumor protein D55                                                   | TUMOR PROTEIN D55 (PTHR19307:SF5)                                                      | -                                                                                     |
| XKR4      | XK-related protein 4                                                | XK-RELATED PROTEIN 4 (PTHR32129:SF14)                                                  | -                                                                                     |
| KIAA0101  | PCNA-associated factor                                              | PCNA-ASSOCIATED FACTOR (PTHR15679:SF8)                                                 | -                                                                                     |
| TRUB1     | Probable tRNA pseudouridine synthase 1                              | TRNA PSEUDOURIDINE SYNTHASE 1-RELATED (PTHR13767:SF2)                                  | nucleic acid binding, lyase isomerase                                                 |
| PCDH11X   | Protocadherin-11 X-linked                                           | PROTODADHERIN-11 X-LINKED-RELATED (PTHR24027:SF15)                                     | cadherin                                                                              |
| LYSMD3    | LysM and putative peptidoglycan-binding domain-containing protein 3 | AND PUTATIVE PEPTIDOGLYCAN-BINDING DOMAIN-CONTAINING PROTEIN 3-RELATED (PTHR20932:SF5) | -                                                                                     |
| HERC5     | E3 ISG15-protein ligase HERC5                                       | E3 ISG15-PROTEIN LIGASE HERC5 (PTHR11254:SF344)                                        | ubiquitin-protein ligase                                                              |
| ATF7      | Cyclic AMP-dependent transcription factor ATF-7                     | CYCLIC AMP-DEPENDENT TRANSCRIPTION FAC- TOR ATF-7 (PTHR19304:SF25)                     | transcription factor, nucleic acid binding                                            |
| CDK6      | Cyclin-dependent kinase 6                                           | CYCLIN-DEPENDENT KINASE 6 (PTHR24056:SF130)                                            | non-receptor serine/threonine protein kinase                                          |
| FAM46A    | Protein FAM46A                                                      | PROTEIN FAM46A (PTHR12974:SF25)                                                        | -                                                                                     |
| XPO4      | Exportin-4                                                          | EXPORTIN-4 (PTHR12596:SF1)                                                             | transfer/carrier protein                                                              |
| ZBTB34    | Zinc finger and BTB domain-containing protein 34                    | ZINC FINGER AND BTB DOMAIN-CONTAINING PROTEIN 34 (PTHR24375:SF44)                      | KRAB box transcription factor                                                         |
| CLDN10    | Claudin-10                                                          | CLAUDIN-10 (PTHR12002:SF13)                                                            | tight junction                                                                        |
| WRB       | Tail-anchored protein insertion receptor WRB                        | TAIL-ANCHORED PROTEIN INSERTION RECEPTOR WRB (PTHR11760:SF21)                          | ribosomal protein                                                                     |
| NUDT15    | Probable 8-oxo-dGTP diphosphatase NUDT15                            | 8-OXO-DGTP DIPHOSPHATASE NUDT15-RELATED (PTHR16099:SF5)                                | -                                                                                     |
| HOPX      | Homeodomain-only protein                                            | HOMEODOMAIN-ONLY PROTEIN (PTHR21408:SF1)                                               | -                                                                                     |
| PMP2      | Myelin P2 protein                                                   | MYELIN P2 PROTEIN (PTHR11955:SF64)                                                     | -                                                                                     |
| SH2D6     | SH2 domain-containing protein 6                                     | SH2 DOMAIN-CONTAINING PROTEIN 6 (PTHR14098:SF16)                                       | signaling molecule                                                                    |
| DFFB      | DNA fragmentation factor subunit beta                               | DNAATION FACTOR-RELATED PROTEIN 4 (PTHR13067:SF2)                                      | nuclease                                                                              |

## Predictive microRNA markers of oral leukoplakia that progress to cancer

|             |                                                            |                                                                                |                                                                                                                    |
|-------------|------------------------------------------------------------|--------------------------------------------------------------------------------|--------------------------------------------------------------------------------------------------------------------|
| C1orf192    | UPF0740 protein C1orf192                                   | UPF0740 PROTEIN C1ORF192 (PTHR34639:SF1)                                       | -                                                                                                                  |
| MRPL16      | 39S ribosomal protein L16, mitochondrial                   | 39S RIBOSOMAL PROTEIN L16, MITOCHONDRIAL (PTHR12220:SF13)                      | ribosomal protein                                                                                                  |
| CSRNP3      | Cysteine/serine-rich nuclear protein 3                     | CYSTEINE/SERINE-RICH NUCLEAR PROTEIN 3 (PTHR13580:SF13)                        | -                                                                                                                  |
| EEF1E1      | Eukaryotic translation elongation factor 1 epsilon-1       | EUKARYOTIC TRANSLATION ELONGATION FACTOR 1 EPSILON-1-RELATED (PTHR11260:SF249) | Transferase, signaling molecule, reductase translation elongation factor, epimerase/racemase, cytoskeletal protein |
| HIGD1A      | HIG1 domain family member 1A, mitochondrial                | HIG1 DOMAIN FAMILY MEMBER 1A, MITOCHONDRIAL (PTHR12297:SF5)                    | -                                                                                                                  |
| FBX030      | F-box only protein 30                                      | F-BOX ONLY PROTEIN 30 (PTHR15933:SF13)                                         | -                                                                                                                  |
| EIF1AX      | Eukaryotic translation initiation factor 1A, X-chromosomal | EUKARYOTIC TRANSLATION INITIATION FACTOR 1A, X-CHROMOSOMAL (PTHR21668:SF4)     | translation initiation factor                                                                                      |
| TMEM170B    | Transmembrane protein 170B                                 | TRANSMEMBRANE PROTEIN 170B (PTHR22779:SF4)                                     | -                                                                                                                  |
| CCDC50      | Coiled-coil domain-containing protein 50                   | COILED-COIL DOMAIN-CONTAINING PROTEIN 50 (PTHR22115:SF1)                       | -                                                                                                                  |
| CBWD1       | COBW domain-containing protein 1                           | COBW DOMAIN-CONTAINING PROTEIN 1-RELATED (PTHR13748:SF38)                      | -                                                                                                                  |
| DUSP23      | Dual specificity protein phosphatase 23                    | DUAL SPECIFICITY PROTEIN PHOSPHATASE 23 (PTHR23339:SF26)                       | protein phosphatase                                                                                                |
| CNOT6       | CCR4-NOT transcription complex subunit 6                   | CCR4-NOT TRANSCRIPTION COMPLEX SUBUNIT 6 (PTHR12121:SF33)                      | Exoribonuclease, nuclease                                                                                          |
| CCL2        | C-C motif chemokine 2                                      | C-C MOTIF CHEMOKINE 2 (PTHR12015:SF98)                                         | chemokine                                                                                                          |
| DUSP18      | Dual specificity protein phosphatase 18                    | DUAL SPECIFICITY PROTEIN PHOSPHATASE 18 (PTHR10159:SF313)                      | -                                                                                                                  |
| NPY5R       | Neuropeptide Y receptor type 5                             | NEUROPEPTIDE Y RECEPTOR TYPE 5 (PTHR24242:SF217)                               | G-protein coupled receptor                                                                                         |
| PGAP1       | GPI inositol-deacylase                                     | GPI INOSITOL-DEACYLASE (PTHR15495:SF15)                                        | transporter                                                                                                        |
| PPM1A       | Protein phosphatase 1A                                     | PROTEIN PHOSPHATASE 1A (PTHR13832:SF262)                                       | protein phosphatase, kinase inhibitor                                                                              |
| SPIN4       | Spindlin-4                                                 | SPINDLIN-4 (PTHR10405:SF9)                                                     | -                                                                                                                  |
| NFIA        | Nuclear factor 1 A-type                                    | NUCLEAR FACTOR 1 A-TYPE (PTHR11492:SF6)                                        | transcription factor, nucleic acid binding                                                                         |
| ABCA6       | ATP-binding cassette sub-family A member 6                 | ATP-BINDING CASSETTE SUB-FAMILY A MEMBER 6 (PTHR19229:SF13)                    | ATP-binding cassette (ABC) transporter                                                                             |
| CD9         | CD9 antigen                                                | CD9 ANTIGEN (PTHR19282:SF163)                                                  | membrane-bound signaling molecule, receptor, cell adhesion molecule                                                |
| UBL3        | Ubiquitin-like protein 3                                   | UBIQUITIN-LIKE PROTEIN 3 (PTHR13169:SF0)                                       | ubiquitin-protein ligase                                                                                           |
| QKI         | Protein quaking                                            | PROTEIN QUAKING (PTHR11208:SF54)                                               | transcription cofactor, mRNA splicing factor                                                                       |
| CCDC73      | Coiled-coil domain-containing protein 73                   | COILED-COIL DOMAIN-CONTAINING PROTEIN 73 (PTHR28660:SF1)                       | -                                                                                                                  |
| CSTF2       | Cleavage stimulation factor subunit 2                      | CLEAVAGE STIMULATION FACTOR SUBUNIT 2 (PTHR23139:SF57)                         | mRNA splicing factor                                                                                               |
| ZNF460      | Zinc finger protein 460                                    | ZINC FINGER PROTEIN 460 (PTHR24384:SF15)                                       | KRAB box transcription factor                                                                                      |
| SRSF7       | Serine/arginine-rich splicing factor 7                     | -                                                                              | -                                                                                                                  |
| SPAG11A     | Sperm-associated antigen 11A                               | SPERM-ASSOCIATED ANTIGEN 11A (PTHR14081:SF1)                                   | -                                                                                                                  |
| GABRA4      | Gamma-aminobutyric acid receptor subunit alpha-4           | GAMMA-AMINOBTYRIC ACID RECEPTOR SUBUNIT ALPHA-4 (PTHR18945:SF393)              | GABA receptor, acetylcholine receptor, GABA receptor                                                               |
| C1QTNF1-AS1 | Protein C1QTNF1-AS1                                        | -                                                                              | -                                                                                                                  |
| POU2F1      | POU domain, class 2, transcription factor 1                | POU DOMAIN, CLASS 2, TRANSCRIPTION FACTOR 1 (PTHR11636:SF47)                   | homeobox transcription factor                                                                                      |
| SNX24       | Sorting nexin-24                                           | SORTING NEXIN-24 (PTHR15813:SF10)                                              | -                                                                                                                  |
| SETD9       | SET domain-containing protein 9                            | SET DOMAIN-CONTAINING PROTEIN 9 (PTHR33524:SF1)                                | -                                                                                                                  |
| RFX7        | DNA-binding protein RFX7                                   | DNA-BINDING PROTEIN RFX7 (PTHR12619:SF2)                                       | transcription cofactor, nuclease                                                                                   |

## Predictive microRNA markers of oral leukoplakia that progress to cancer

|          |                                                                               |                                                                                                |                                                                                                                |
|----------|-------------------------------------------------------------------------------|------------------------------------------------------------------------------------------------|----------------------------------------------------------------------------------------------------------------|
| INO80D   | INO80 complex subunit D                                                       | INO80 COMPLEX SUBUNIT D (PTHR16198:SF2)                                                        | -                                                                                                              |
| PAFAH1B2 | Platelet-activating factor acetylhydrolase IB subunit beta                    | PLATELET-ACTIVATING FACTOR ACETYLHYDROLASE IB SUBUNIT BETA (PTHR11852:SF1)                     | -                                                                                                              |
| STIM2    | Stromal interaction molecule 2                                                | STROMAL INTERACTION MOLECULE 2 (PTHR15136:SF2)                                                 | -                                                                                                              |
| UBE2E2   | Ubiquitin-conjugating enzyme E2 E2                                            | UBIQUITIN-CONJUGATING ENZYME E2 E2 (PTHR24068:SF62)                                            | ligase                                                                                                         |
| ZNF264   | Zinc finger protein 264                                                       | ZINC FINGER PROTEIN 264 (PTHR24384:SF96)                                                       | KRAB box transcription factor                                                                                  |
| PCDH11Y  | Protocadherin-11 Y-linked                                                     | PROTODADHERIN-11 X-LINKED-RELATED (PTHR24027:SF15)                                             | cadherin                                                                                                       |
| ST8SIA3  | Sia-alpha-2,3-Gal-beta-1,4-GlcNAc-R:alpha 2,8-sialyltransferase               | SIA-ALPHA-2,3-GAL-BETA-1,4-GLCNAC-R:ALPHA 2,8-SIALYLTRANSFERASE (PTHR11987:SF36)               | -                                                                                                              |
| RBPJ     | Recombining binding protein suppressor of hairless                            | RECOMBINING BINDING PROTEIN SUPPRESSOR OF HAIRLESS (PTHR10665:SF3)                             | transcription factor, nucleic acid binding                                                                     |
| RBMS3    | RNA-binding motif, single-stranded-interacting protein 3                      | RNA-BINDING MOTIF, SINGLE-STRANDED-INTERACTING PROTEIN 3 (PTHR24012:SF473)                     | -                                                                                                              |
| ZNF573   | Zinc finger protein 573                                                       | ZINC FINGER PROTEIN 573 (PTHR24377:SF159)                                                      | -                                                                                                              |
| FSD1L    | FSD1-like protein                                                             | FSD1-LIKE PROTEIN (PTHR24099:SF8)                                                              | -                                                                                                              |
| RBM7     | RNA-binding protein 7                                                         | RNA-BINDING PROTEIN 7 (PTHR13798:SF4)                                                          | nucleic acid binding                                                                                           |
| ARRDC3   | Arrestin domain-containing protein 3                                          | ARRESTIN DOMAIN-CONTAINING PROTEIN 3 (PTHR11188:SF49)                                          | -                                                                                                              |
| RNASE6   | Ribonuclease K6                                                               | RIBONUCLEASE K6 (PTHR11437:SF4)                                                                | Endoribonuclease, nuclease, hydrolase, enzyme modulator                                                        |
| DERL2    | Derlin-2                                                                      | DERLIN-2 (PTHR11009:SF5)                                                                       | receptor                                                                                                       |
| ZNF736   | Zinc finger protein 736                                                       | ZINC FINGER PROTEIN 736-RELATED (PTHR24384:SF98)                                               | KRAB box transcription factor                                                                                  |
| UBE2W    | Ubiquitin-conjugating enzyme E2 W                                             | UBIQUITIN-CONJUGATING ENZYME E2 W (PTHR24067:SF108)                                            | -                                                                                                              |
| SLC25A31 | ADP/ATP translocase 4                                                         | ADP/ATP TRANSLOCASE 4 (PTHR24089:SF381)                                                        | amino acid transporter, mitochondrial carrier protein, transfer/carrier protein, ribosomal protein, calmodulin |
| UFM1     | Ubiquitin-fold modifier 1                                                     | UBIQUITIN-FOLD MODIFIER 1 (PTHR15825:SF0)                                                      | -                                                                                                              |
| GPRASP2  | G-protein coupled receptor-associated sorting protein 2                       | G-PROTEIN COUPLED RECEPTOR-ASSOCIATED SORTING PROTEIN 2 (PTHR15712:SF10)                       | -                                                                                                              |
| C16orf72 | UPF0472 protein C16orf72                                                      | UPF0472 PROTEIN C16ORF72 (PTHR31624:SF3)                                                       | -                                                                                                              |
| DNM2     | Dynamamin-2                                                                   | DYNAMIN-2 (PTHR11566:SF23)                                                                     | Hydrolase, small GTPase, microtubule family cytoskeletal protein                                               |
| PIK3CB   | Phosphatidylinositol 4,5-bisphosphate 3-kinase catalytic subunit beta isoform | PHOSPHATIDYLINOSITOL 4,5-BISPHOSPHATE 3-KINASE CATALYTIC SUBUNIT BETA ISOFORM (PTHR10048:SF33) | kinase                                                                                                         |
| ANKRD13A | Ankyrin repeat domain-containing protein 13A                                  | ANKYRIN REPEAT DOMAIN-CONTAINING PROTEIN 13A (PTHR12447:SF4)                                   | -                                                                                                              |
| NR3C2    | Mineralocorticoid receptor                                                    | MINERALOCORTICOID RECEPTOR (PTHR24084:SF22)                                                    | nuclear hormone receptor, receptor, nucleic acid binding                                                       |
| AP2A2    | AP-2 complex subunit alpha-2                                                  | AP-2 COMPLEX SUBUNIT ALPHA-2 (PTHR22780:SF24)                                                  | transmembrane receptor regulatory/adaptor protein                                                              |
| MMGT1    | Membrane magnesium transporter 1                                              | MEMBRANE MAGNESIUM TRANSPORTER 1 (PTHR21181:SF7)                                               | -                                                                                                              |
| SHC1     | SHC-transforming protein 1                                                    | SHC-TRANSFORMING PROTEIN 1 (PTHR10337:SF2)                                                     | signaling molecule                                                                                             |
| FAM175B  | BRISC complex subunit Abro1                                                   | BRISC COMPLEX SUBUNIT ABRO1 (PTHR31728:SF3)                                                    | -                                                                                                              |
| TMEM64   | Transmembrane protein 64                                                      | TRANSMEMBRANE PROTEIN 64 (PTHR12677:SF24)                                                      | -                                                                                                              |
| ARX      | Homeobox protein ARX                                                          | HOMEODOMAIN-HELICASE-DNA-BINDING PROTEIN 5 (PTHR10799:SF583)                                   | homeobox transcription factor, DNA binding protein                                                             |
| CHD5     | Chromodomain-helicase-DNA-binding protein 5                                   | CHROMODOMAIN-HELICASE-DNA-BINDING PROTEIN 5 (PTHR10799:SF583)                                  | DNA helicase, helicase                                                                                         |
| GPT2     | Alanine aminotransferase 2                                                    | ALANINE AMINOTRANSFERASE 2 (PTHR11751:SF311)                                                   | transaminase                                                                                                   |

## Predictive microRNA markers of oral leukoplakia that progress to cancer

|          |                                                                             |                                                                                              |                                                                                                                |
|----------|-----------------------------------------------------------------------------|----------------------------------------------------------------------------------------------|----------------------------------------------------------------------------------------------------------------|
| VWA8     | von Willebrand factor A domain-containing protein 8                         | VON WILLEBRAND FACTOR A DOMAIN-CONTAINING PROTEIN 8 (PTHR21610:SF9)                          | -                                                                                                              |
| TPPP     | Tubulin polymerization-promoting protein                                    | TUBULIN POLYMERIZATION-PROMOTING PROTEIN (PTHR12932:SF18)                                    | non-motor microtubule binding protein                                                                          |
| SLC25A35 | Solute carrier family 25 member 35                                          | SOLUTE CARRIER FAMILY 25 MEMBER 35 (PTHR24089:SF274)                                         | amino acid transporter, mitochondrial carrier protein, transfer/carrier protein, ribosomal protein, calmodulin |
| DNAJC13  | DnaJ homolog subfamily C member 13                                          | DNAJ HOMOLOG SUBFAMILY C MEMBER 13 (PTHR24078:SF25)                                          | -                                                                                                              |
| AKAP1    | A-kinase anchor protein 1, mitochondrial                                    | A-KINASE ANCHOR PROTEIN 1, MITOCHONDRIAL (PTHR22948:SF18)                                    | signaling molecule, nuclease                                                                                   |
| HSPH1    | Heat shock protein 105 kDa                                                  | HEAT SHOCK PROTEIN 105 KDA (PTHR19375:SF18)                                                  | Hsp70 family chaperone                                                                                         |
| FOXC1    | Forkhead box protein C1                                                     | FORKHEAD BOX PROTEIN C1 (PTHR11829:SF166)                                                    | transcription factor, DNA binding protein                                                                      |
| EPHA7    | Ephrin type-A receptor 7                                                    | EPHRIN TYPE-A RECEPTOR 7 (PTHR24416:SF377)                                                   | -                                                                                                              |
| RNF217   | Probable E3 ubiquitin-protein ligase RNF217                                 | E3 UBIQUITIN-PROTEIN LIGASE RNF217-RELATED (PTHR11685:SF113)                                 | ubiquitin-protein ligase                                                                                       |
| EZR      | Ezrin                                                                       | EZRIN (PTHR23281:SF13)                                                                       | actin family cytoskeletal protein                                                                              |
| NOVA1    | RNA-binding protein Nova-1                                                  | RNA-BINDING PROTEIN NOVA-1 (PTHR10288:SF150)                                                 | mRNA splicing factor, ribonucleoprotein, enzyme modulator                                                      |
| SGIP1    | SH3-containing GRB2-like protein 3-interacting protein 1                    | -                                                                                            | -                                                                                                              |
| RAB10    | Ras-related protein Rab-10                                                  | RAS-RELATED PROTEIN RAB-10 (PTHR24073:SF483)                                                 | -                                                                                                              |
| ZCCHC24  | Zinc finger CCHC domain-containing protein 24                               | ZINC FINGER CCHC DOMAIN-CONTAINING PROTEIN 24 (PTHR15439:SF4)                                | nuclease                                                                                                       |
| COX5A    | Cytochrome c oxidase subunit 5A, mitochondrial                              | CYTOCHROME C OXIDASE SUBUNIT 5A, MITOCHONDRIAL (PTHR14200:SF11)                              | oxidase                                                                                                        |
| NR3C1    | Glucocorticoid receptor                                                     | GLUCOCORTICOID RECEPTOR (PTHR24084:SF4)                                                      | nuclear hormone receptor, receptor, nucleic acid binding                                                       |
| NCOA7    | Nuclear receptor coactivator 7                                              | NUCLEAR RECEPTOR COACTIVATOR 7 (PTHR23354:SF68)                                              | -                                                                                                              |
| RAB22A   | Ras-related protein Rab-22A                                                 | RAS-RELATED PROTEIN RAB-22A (PTHR24073:SF401)                                                | -                                                                                                              |
| CAMK2D   | Calcium/calmodulin-dependent protein kinase type II subunit delta           | CALCIUM/CALMODULIN-DEPENDENT PROTEIN KINASE TYPE II SUBUNIT DELTA (PTHR24347:SF108)          | non-receptor serine/threonine protein kinase                                                                   |
| FAM168B  | Myelin-associated neurite-outgrowth inhibitor                               | MYELIN-ASSOCIATED NEURITE-OUTGROWTH INHIBITOR (PTHR31844:SF2)                                | -                                                                                                              |
| TMEM178B | Transmembrane protein 178B                                                  | TRANSMEMBRANE PROTEIN 178B (PTHR32005:SF1)                                                   | -                                                                                                              |
| FRS2     | Fibroblast growth factor receptor substrate 2                               | FIBROBLAST GROWTH FACTOR RECEPTOR SUBSTRATE 2 (PTHR21258:SF40)                               | -                                                                                                              |
| ZBTB20   | Zinc finger and BTB domain-containing protein 20                            | -                                                                                            | -                                                                                                              |
| ZNF423   | Zinc finger protein 423                                                     | ZINC FINGER PROTEIN 423 (PTHR24402:SF210)                                                    | KRAB box transcription factor                                                                                  |
| ELAVL3   | ELAV-like protein 3                                                         | -                                                                                            | -                                                                                                              |
| ESRRG    | Estrogen-related receptor gamma                                             | ESTROGEN-RELATED RECEPTOR GAMMA (PTHR24084:SF21)                                             | nuclear hormone receptor, receptor, nucleic acid binding                                                       |
| ATG7     | Ubiquitin-like modifier-activating enzyme ATG7                              | UBIQUITIN-LIKE MODIFIER-ACTIVATING ENZYME ATG7 (PTHR10953:SF3)                               | transfer/carrier protein, ligase                                                                               |
| SMIM13   | Small integral membrane protein 13                                          | SMALL INTEGRAL MEMBRANE PROTEIN 13 (PTHR36877:SF1)                                           | -                                                                                                              |
| ZNF521   | Zinc finger protein 521                                                     | ZINC FINGER PROTEIN 521 (PTHR24402:SF222)                                                    | KRAB box transcription factor                                                                                  |
| AP1S1    | AP-1 complex subunit sigma-1A                                               | AP-1 COMPLEX SUBUNIT SIGMA-1A (PTHR11753:SF14)                                               | vesicle coat protein                                                                                           |
| KHDRBS3  | KH domain-containing, RNA-binding, signal transduction-associated protein 3 | KH DOMAIN-CONTAINING, RNA-BINDING, SIGNAL TRANSDUCTION-ASSOCIATED PROTEIN 3 (PTHR11208:SF29) | transcription cofactor, mRNA splicing factor                                                                   |

## Predictive microRNA markers of oral leukoplakia that progress to cancer

|          |                                                                      |                                                                                       |                                                                                                                                             |
|----------|----------------------------------------------------------------------|---------------------------------------------------------------------------------------|---------------------------------------------------------------------------------------------------------------------------------------------|
| JAK2     | Tyrosine-protein kinase JAK2                                         | TYROSINE-PROTEIN KINASE JAK2 (PTHR24418:SF179)                                        | non-receptor tyrosine protein kinase                                                                                                        |
| PPP3R1   | Calcineurin subunit B type 1                                         | CALCINEURIN SUBUNIT B TYPE 1 (PTHR23056:SF43)                                         | protein phosphatase, calmodulin                                                                                                             |
| FARP1    | FERM, RhoGEF and pleckstrin domain-containing protein 1              | FERM, RHOGEF AND PLECKSTRIN DOMAIN-CONTAINING PROTEIN 1 (PTHR12673:SF105)             | guanyl-nucleotide exchange factor                                                                                                           |
| NRBF2    | Nuclear receptor-binding factor 2                                    | NUCLEAR RECEPTOR-BINDING FACTOR 2 (PTHR14964:SF2)                                     | -                                                                                                                                           |
| SMOC1    | SPARC-related modular calcium-binding protein 1                      | SPARC-RELATED MODULAR CALCIUM-BINDING PROTEIN 1 (PTHR12352:SF13)                      | calcium-binding protein                                                                                                                     |
| EPHA5    | Ephrin type-A receptor 5                                             | EPHRIN TYPE-A RECEPTOR 5 (PTHR24416:SF17)                                             | -                                                                                                                                           |
| MYO10    | Unconventional myosin-X                                              | UNCONVENTIONAL MYOSIN-X (PTHR13140:SF276)                                             | G-protein modulator, actin binding motor protein, cell junction protein                                                                     |
| ATF2     | Cyclic AMP-dependent transcription factor ATF-2                      | CYCLIC AMP-DEPENDENT TRANSCRIPTION FACTOR ATF-2 (PTHR19304:SF9)                       | transcription factor, nucleic acid binding                                                                                                  |
| PPARGC1A | Peroxisome proliferator-activated receptor gamma coactivator 1-alpha | PEROXISOME PROLIFERATOR-ACTIVATED RECEPTOR GAMMA COACTIVATOR 1-ALPHA (PTHR15528:SF10) | transcription cofactor                                                                                                                      |
| FBN2     | Fibrillin-2                                                          | FIBRILLIN-2 (PTHR24039:SF26)                                                          | signaling molecule, extracellular matrix glycoprotein, extracellular matrix structural protein, cell adhesion molecule, annexin, calmodulin |
| CHP1     | Calcineurin B homologous protein 1                                   | CALCINEURIN B HOMOLOGOUS PROTEIN 1 (PTHR23056:SF17)                                   | protein phosphatase, calmodulin                                                                                                             |
| RHOT1    | Mitochondrial Rho GTPase 1                                           | MITOCHONDRIAL RHO GTPASE 1 (PTHR24072:SF124)                                          | small GTPase                                                                                                                                |
| ANKRD13C | Ankyrin repeat domain-containing protein 13C                         | ANKYRIN REPEAT DOMAIN-CONTAINING PROTEIN 13C (PTHR12447:SF0)                          | -                                                                                                                                           |
| JARID2   | Protein Jumonji                                                      | PROTEIN JUMONJI (PTHR10694:SF44)                                                      | zinc finger transcription factor                                                                                                            |
| RHOBTB3  | Rho-related BTB domain-containing protein 3                          | RHO-RELATED BTB DOMAIN-CONTAINING PROTEIN 3 (PTHR24072:SF139)                         | small GTPase                                                                                                                                |
| AGO2     | Protein argonaute-2                                                  | PROTEIN ARGONAUTE-2 (PTHR22891:SF0)                                                   | -                                                                                                                                           |
| SOX11    | Transcription factor SOX-11                                          | TRANSCRIPTION FACTOR SOX-11 (PTHR10270:SF113)                                         | HMG box transcription factor, nucleic acid binding                                                                                          |
| PDE4A    | cAMP-specific 3',5'-cyclic phosphodiesterase 4A                      | CAMP-SPECIFIC 3',5'-CYCLIC PHOSPHODIESTERASE 4A (PTHR11347:SF74)                      | phosphodiesterase                                                                                                                           |
| SLC43A1  | Large neutral amino acids transporter small subunit 3                | LARGE NEUTRAL AMINO ACIDS TRANSPORTER SMALL SUBUNIT 3 (PTHR20766:SF0)                 | amino acid transporter                                                                                                                      |
| SIRT1    | NAD-dependent protein deacetylase sirtuin-1                          | NAD-DEPENDENT PROTEIN DEACETYLASE SIRTUIN-1 (PTHR11085:SF15)                          | chromatin/chromatin-binding protein, deacetylase                                                                                            |
| LRRC40   | Leucine-rich repeat-containing protein 40                            | LEUCINE-RICH REPEAT-CONTAINING PROTEIN 40 (PTHR23155:SF424)                           | -                                                                                                                                           |
| SLC16A6  | Monocarboxylate transporter 7                                        | MONOCARBOXYLATE TRANSPORTER 7 (PTHR11360:SF20)                                        | transporter                                                                                                                                 |
| INO80D   | INO80 complex subunit D                                              | INO80 COMPLEX SUBUNIT D (PTHR16198:SF2)                                               | -                                                                                                                                           |
| HOXC8    | Homeobox protein Hox-C8                                              | HOMEODOMAIN PROTEIN HOX-C8 (PTHR24326:SF255)                                          | homeobox transcription factor, DNA binding protein                                                                                          |
| SPRYD7   | SPRY domain-containing protein 7                                     | SPRY DOMAIN-CONTAINING PROTEIN 7 (PTHR20951:SF2)                                      | -                                                                                                                                           |
| PPM1K    | Protein phosphatase 1K, mitochondrial                                | PROTEIN PHOSPHATASE 1K, MITOCHONDRIAL (PTHR13832:SF267)                               | protein phosphatase, kinase inhibitor                                                                                                       |
| PHOX2B   | Paired mesoderm homeobox protein 2B                                  | PAIRED MESODERM HOMEODOMAIN PROTEIN 2B (PTHR24329:SF301)                              | homeobox transcription factor, DNA binding protein                                                                                          |
| DVL3     | Segment polarity protein dishevelled homolog DVL-3                   | SEGMENT POLARITY PROTEIN DISHEVELLED HOMOLOG DVL-3 (PTHR10878:SF6)                    | signaling molecule, enzyme modulator                                                                                                        |
| TNRC6B   | Trinucleotide repeat-containing gene 6B protein                      | TRINUCLEOTIDE REPEAT-CONTAINING GENE 6B PROTEIN (PTHR13020:SF32)                      | -                                                                                                                                           |
| MLXIP    | MLX-interacting protein                                              | MLX-INTERACTING PROTEIN (PTHR15741:SF23)                                              | basic helix-loop-helix transcription factor, nucleic acid binding                                                                           |

miRNAs-208b-3p, 204-5p, 129-2-3p and 3065-5p predicted gene targets according to TargetScanHuman ([www.targetscan.org](http://www.targetscan.org)) Release 7.0: August 2015.
